# Supplementary material for: Large scale energy storage using multistage osmotic processes: approaching high efficiency and energy density
Source: Royal Society of Chemistry journal article supplement (doi:10.1039/c6se00013d), 2017-01-01
Supplement: c6se00013d1.pdf [file c6se00013d1.pdf]

# Supplementary Information

## Large scale energy storage using multistage osmotic processes: Approaching high efficiency and energy density

Devesh Bharadwaj\*, Henning Struchtrup†

January 22, 2017

### 1 Multistage Reverse Osmosis Model

The salty water (*sw*) stream enters the RO part of the OES system, at a volumetric flow of  $\dot{V}_{sw}$  and at environmental pressure  $P_0$ . As the PEX requires equal volumetric flow on both sides, the *sw* stream is split into  $\dot{V}_{sw}''$  and  $\dot{V}_{sw}'$ , where  $\dot{V}_{sw}''$  is equal to the volumetric flow of the brine (*br*) solution and  $\dot{V}_{sw}'$  is equal to the volumetric flow of the fresh water (*fw*) stream.  $\dot{V}_{sw}''$  stream is pressurized in a booster pump to overcome the pressure loss  $\delta P$ , before it is sent to the PEX, to exchange pressure between the *br* stream. The other  $\dot{V}_{sw}'$  stream is pressurized using a high pressure pump to  $P_1^r$  and is then mixed back with the  $\dot{V}_{sw}''$  stream to make  $\dot{V}_{sw1}$ .

After being pressurized, the salty water (*sw*) stream  $\dot{V}_{sw1}$  enters the first membrane module ( $mm_1$ ) where some of the fresh water (*fw*) crosses the membrane as  $\dot{V}_{fw1}^r$ . The volumetric flow of the *fw* crossing the membrane is controlled by the hydraulic pressure  $\Delta P_1^r$  across the membrane module, which we explain later for the  $i^{th}$  membrane module ( $mm_i$ ) using the membrane effectiveness factor (Eq. 9).

We define a *fw* recovery ratio for a membrane module  $mm_i$  which describes how much *fw* is recovered from the *sw* stream entering the membrane module. All of the membrane modules have their own separate *fw* recovery ratio  $X$ . We describe this ratio and other properties for the  $i^{th}$  membrane module ( $mm_i$ ). The *fw* recovery ratio for  $mm_i$  is defined as

$$X_i = \frac{\dot{V}_{fw_i}^r}{\dot{V}_{sw_i}} = \frac{\dot{V}_{sw_i} - \dot{V}_{sw_{i+1}}}{\dot{V}_{sw_i}} = 1 - \frac{\dot{V}_{sw_{i+1}}}{\dot{V}_{sw_i}} \quad (1)$$

where the *sw* stream entering the  $i^{th}$  membrane module ( $mm_i$ ) is labelled as  $\dot{V}_{sw_i}$ ;  $\dot{V}_{fw_i}^r$  is the *fw* stream permeating  $mm_i$ , and  $\dot{V}_{sw_{i+1}}$  is the resulting saltier *sw* stream leaving  $mm_i$  on the retentate side. The *fw* recovery ratio for RO is defined such that the  $X$  value for any RO membrane module is always less than or equal to 1. A  $X$  value close to 0 indicates no *fw* crosses the membrane layer, on the other hand, an  $X$  value close to 1 indicates 100% of the *fw* is recovered from the *sw* stream.

We use the salt rejection coefficient  $R$  defined for a membrane to calculate the salt crossflow, i.e. from *sw* to *fw* side. The salt rejection coefficient is broadly used in the membrane industry [1]. The salt rejection for all membrane modules is kept constant. It is generally defined as

$$R = \left( 1 - \frac{C_{fw_i}}{C_{sw_i}} \right) \quad (2)$$

where  $C_{sw_i}$  is the molar concentration of the *sw* stream entering the membrane module and  $C_{fw_i}$  is the concentration of the *fw* stream permeating the membrane. As we know the molar salt flow in the *sw* stream entering the membrane module, we can find how much salt is left on the retentate side using the rejection coefficient, as

\*Corresponding author: Dept. of Mechanical Engineering, University of Victoria, Victoria, BC, Canada, e-mail: devesh@uvic.ca

†Dept. of Mechanical Engineering, University of Victoria, Victoria, BC, Canada, e-mail: struchtr@uvic.ca

well as find how much salt is passed on to the  $fw$  side. In multistage RO, a membrane module of length  $L$  is cut down to  $n$  membrane modules of length  $\frac{L}{n}$  each. In the same way, we have assumed that the salt flow is distributed among the membrane modules, as the rejection coefficient value used for simulations are for a full membrane module.

The molar salt flow balance for streams leaving the  $i^{th}$  membrane module ( $mm_i$ ) using  $R$  and salt distribution is described as,

$$\dot{V}_{sw_{i+1}} \text{ stream:} \quad \dot{n}_{sw_{i+1}}^s = \dot{n}_{sw_i}^s - \frac{(1-R)\dot{n}_{sw_i}^s}{n}, \quad (3)$$

$$\dot{V}_{fw_i} \text{ stream:} \quad \dot{n}_{fw_i}^s = \dot{n}_{sw_i}^s - \dot{n}_{sw_{i+1}}^s = \frac{(1-R)\dot{n}_{sw_i}^s}{n} \quad (4)$$

where  $\dot{n}_{sw_i}^s$  is the molar flow of salt in the  $sw$  stream entering  $mm_i$ ,  $\dot{n}_{fw_i}^s$  is the molar salt flow in the  $fw$  stream that crossed the membrane,  $\dot{n}_{sw_{i+1}}^s$  is the remaining molar salt flow on the retentate side and  $n$  is the number of stages in the multistage RO process.

Using the volumetric and molar salt flows we can describe the osmotic pressures of the streams leaving  $mm_i$ , note that  $\dot{V}_{sw_i}$  stream's osmotic pressure is known. The osmotic pressure for the  $\dot{V}_{sw_{i+1}}$  stream is  $\pi_{sw_{i+1}}^r$  and for the  $fw$  stream it is  $\pi_{fw_i}^r$ , where the superscript ' $r$ ' denotes that this variable is used for the RO stage. Further using Morse osmotic pressure equation with van't Hoff's correction factor [2] and Eqns. (1, 3, 4,), we describe the osmotic pressures as,

$$\dot{V}_{sw_{i+1}} \text{ stream} : \quad \pi_{sw_{i+1}}^r = i\bar{R}T \frac{\dot{n}_{sw_{i+1}}^s}{\dot{V}_{sw_{i+1}}} = i\bar{R}T \frac{\dot{n}_{sw_i}^s - \frac{1}{n}(1-R)\dot{n}_{sw_i}^s}{\dot{V}_{sw_i}(1-X_i)} \quad (5)$$

$$\dot{V}_{fw_i} \text{ stream} : \quad \pi_{fw_i}^r = i\bar{R}T \frac{\dot{n}_{fw_i}^s}{\dot{V}_{fw_i}} = i\bar{R}T \frac{\frac{1}{n}(1-R)\dot{n}_{sw_i}^s}{\dot{V}_{sw_i}X_i} \quad (6)$$

where  $i$  is the van't Hoff factor;  $\bar{R}$  is the universal gas constant and  $T$  is the temperature of the streams, which is constant (rest of the variables are predefined).

With Eqs. (1,3,4,5 and 6) we have all properties associated with the streams entering and leaving the  $i^{th}$  membrane module ( $mm_i$ ) in terms of the known variables. The next step is to express the hydraulic pressure required in  $mm_i$ , in terms of  $X_i$  and other known streams and membrane properties/variables. For this we use the membrane effectiveness equation. We define the membrane effectiveness equation which was proposed in our previous work[3], to account for the reverse salt flux as

$$\eta_{mm} = \frac{\Delta\pi_{in} - \Delta\pi_{out}}{\Delta\pi_{in} - \Delta P}, \quad (7)$$

where  $\Delta\pi_{in}$  is the osmotic pressure difference of the streams entering the membrane module,  $\Delta\pi_{out}$  is the difference of the osmotic pressure of the streams exiting the membrane module, and  $\Delta P$  is the hydraulic pressure difference between the streams entering the membrane module. For a RO process, as there is only one stream entering the membrane module, so that

$$\eta_{mm_i}^r = \frac{\pi_{sw_i}^r - (\pi_{sw_{i+1}}^r - \pi_{fw_i}^r)}{\pi_{sw_i}^r - \Delta P_i^r} \quad (8)$$

where  $\pi_{sw_i}^r$  is the osmotic pressure of the  $\dot{V}_{sw_i}$  stream entering  $mm_i$ ,  $\pi_{fw_i}^r$  is the osmotic pressure of the  $\dot{V}_{fw_i}$  stream permeating the membrane layer,  $\pi_{sw_{i+1}}^r$  is the osmotic pressure of the saltier retentate stream  $\dot{V}_{sw_{i+1}}$  leaving the membrane module, and  $\Delta P_i^r$  is the difference of hydraulic pressure between the  $\dot{V}_{sw_i}$  stream entering  $mm_i$  and the  $\dot{V}_{fw_i}$  stream leaving the membrane module.

Using the membrane effectiveness Eq. (8) along with Eqs.(5) and (6) we solve for the hydraulic pressure as

$$\Delta P_i^r = (P_i^r - P_0) = \pi_{sw_i} - \frac{\pi_{sw_{i+1}} - \pi_{fw_i}}{\eta_{mm}^r},$$

or with Eqs. (5) and (6)

$$P_i^r = \pi_{sw_i} - \frac{1}{\eta_{mm_i}^r} \left\{ \pi_{sw_i} - \left( i\bar{R}T \frac{\dot{n}_{sw_i}^s - \frac{(1-R)\dot{n}_{sw_i}^s}{n}}{\dot{V}_{sw_i}(1-X_i)} - i\bar{R}T \frac{\frac{(1-R)\dot{n}_{sw_i}^s}{n}}{\dot{V}_{sw_i}X_i} \right) \right\} + P_0 \quad (9)$$

The equations suggest that the amount of hydraulic pressure applied in  $mm_i$  depends on the membrane's performance properties, osmotic pressure of the  $\dot{V}_{sw_i}$  stream entering the membrane module and is ultimately controlled by the desired  $fw$  recovery ratio  $X_i$  for that particular membrane module  $mm_i$ .

## 2 Multistage Pressure Retarded Osmosis Model

The brine ( $br$ ) and fresh water ( $fw$ ) streams enter the PRO part of the OES system at volumetric flows of  $\dot{V}_{br}$  and  $\dot{V}_{fw}$ , respectively; both streams enter at environmental pressure  $P_0$ . As the PEX requires equal volumetric flow on each side, the  $sw$  stream is split into  $\dot{V}_{sw}''$  and  $\dot{V}_{sw,p}'$ , where  $\dot{V}_{sw}''$  is equal to the volumetric flow of the  $br$  solution and  $\dot{V}_{sw,p}'$  is equal to the volumetric flow of the remainder.  $\dot{V}_{sw}''$  stream is pressurized in a pump to match the pressure required in the first membrane module and to overcome the PEX pressure loss  $\delta P$ , before it is sent to the PEX, to exchange pressure between the  $br$  stream  $\dot{V}_{br_1}$ . The pressure of the other  $\dot{V}_{sw,p}'$  stream is dropped using a turbine to  $P_0$  bar and is then mixed back with the  $\dot{V}_{sw}''$  stream, to make  $\dot{V}_{sw}$ .

After being pressurized to  $P_1^p$ , the brine ( $br$ ) stream  $\dot{V}_{br_1}$  enters the first membrane module ( $mm_1$ ) on the draw side, along with the fresh water ( $fw$ ) stream (which is at environmental pressure  $P_0$ ) on the feed side. The osmotic pressure difference between the streams causes some of the fresh water ( $fw$ ) from the feed side to cross the membrane layer and dilutes the  $br$  stream. The amount of  $fw$  water crossing the membrane is controlled by the hydraulic pressure difference  $\Delta P_1^p$  between the two streams, see Eqs. (18) and (20) further below.

We define a fresh water ( $fw$ ) mixing ratio  $Y_i$  for the  $i^{th}$  membrane module ( $mm_i$ ) which describes how much  $fw$  is mixed with the brine ( $br$ ) stream entering the membrane module. All of the membrane modules have their own separate  $fw$  recovery ratio  $Y_i$ . The  $fw$  recovery ratio for  $mm_i$  is defined as

$$Y_i = \frac{\dot{V}_{br_{i+1}}}{\dot{V}_{br_i}} = \frac{\dot{V}_{br_i} + (\dot{V}_{fw_i}^p - \dot{V}_{fw_{i+1}}^p)}{\dot{V}_{br_i}} = 1 + \frac{\dot{V}_{fw_i}^p}{\dot{V}_{br_i}} - \frac{\dot{V}_{fw_{i+1}}^p}{\dot{V}_{br_i}} \quad (10)$$

Further we can describe the outgoing brine and fresh water streams in terms of the incoming streams as

$$\dot{V}_{br_{i+1}} = Y_i \dot{V}_{br_i} \quad (11)$$

$$\dot{V}_{fw_{i+1}}^p = \dot{V}_{fw_i}^p - (\dot{V}_{br_{i+1}} - \dot{V}_{br_i}) = \dot{V}_{fw_i}^p - \dot{V}_{br_i}(Y_i - 1) \quad (12)$$

where the brine ( $br$ ) stream entering the  $i^{th}$  membrane module ( $mm_i$ ) on the draw side is labelled as  $\dot{V}_{br_i}$ ;  $\dot{V}_{fw_i}^p$  is the  $fw$  stream entering  $mm_i$  on the feed side;  $\dot{V}_{br_i}$  is the diluted  $br$  stream exiting  $mm_i$  on the draw side and  $\dot{V}_{fw_{i+1}}^p$  is the left over  $fw$  stream exiting  $mm_i$  on the feed side. The  $fw$  mixing ratio for PRO is defined such that  $Y_i$  for any PRO membrane is always larger or equal to 1. A  $Y_i$  value close to 1 indicates no  $fw$  crosses the membrane layer, on the other hand, a higher  $Y_i$  value, for instance  $Y_i = 2$  would indicate that the amount of  $fw$  mixed results in twice the amount of the  $br$  stream.

We use the salt rejection coefficient  $R^p$  defined for a PRO membrane module to find the salt crossflow from the draw side ( $br$  stream) to the feed side ( $fw$  stream). The salt rejection coefficient is broadly used in the RO membrane industry, described in Eq. 2. In contrast, the salt rejection coefficient for a membrane module has to be defined. Unlike RO, PRO has two streams entering and leaving the membrane module, hence the rejection coefficient is defined to account for the salt entering the membrane module in both feed and draw streams. The salt rejection coefficient for all membrane modules is kept constant for simulations. It is defined as

$$R^p = \left( 1 - \frac{(C_{fw_i} - C_{fw_{i+1}})}{C_{br_i}} \right), \quad (13)$$

where  $C_{fw_i}$  is the molar concentration of the fresh water ( $fw$ ) stream entering the  $i^{th}$  membrane module ( $mm_i$ );  $C_{fw_{i+1}}$  is the concentration of the  $fw$  stream exiting  $mm_i$ , and  $C_{br_i}$  is the molar concentration of the brine ( $br$ ) stream entering  $mm_i$  on the draw side. As we know the molar salt flow in the  $br$  and  $fw$  stream entering the membrane module, we can find how much salt is left on the draw side ( $br$  stream) using the rejection coefficient, as well as, find how much salt is passed on to the feed side ( $fw$  stream). In multistage PRO, a membrane module of length  $L$  is cut down to  $n$  membrane modules of length  $\frac{L}{n}$  each. In the same way, we have assumed that the reverse salt flow is distributed among the membrane modules, as the rejection coefficient value used

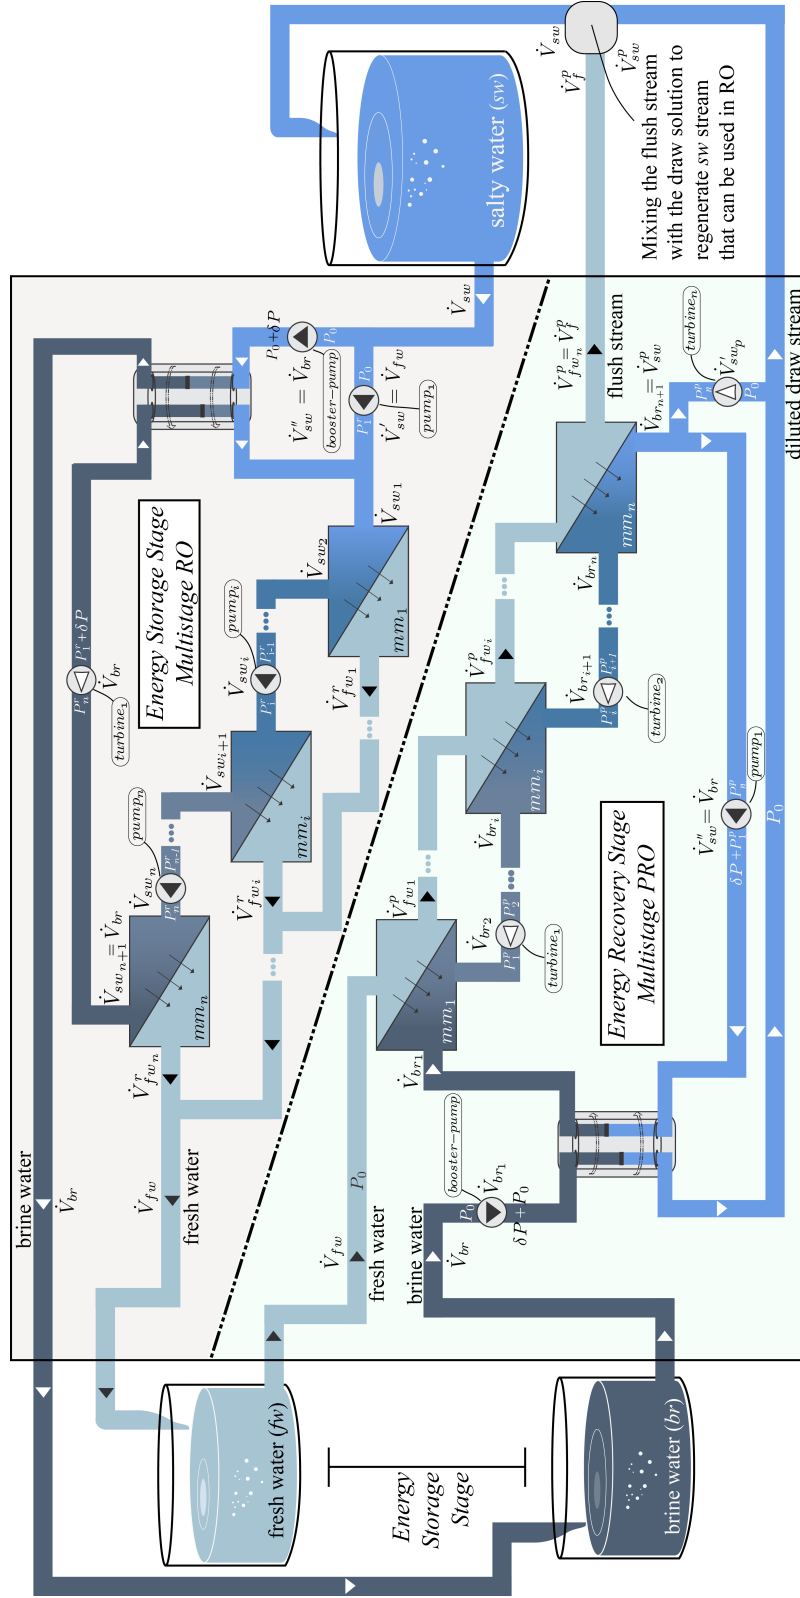

Figure 1: Process schematic of a  $n$ -stage OES system. The OES process is inside the box, where the top (light red) section is the energy storage stage when the  $sw$  is separated to  $fw$  and  $br$ , using multistage RO. The bottom (light green) section is the energy recovery stage, where the streams are mixed via multistage PRO.

for simulations are for a full membrane module. The molar salt flow balance for streams leaving  $mm_i$  using  $R^p$ , Eq. (13) gives

$$\dot{V}_{br_{i+1}} \text{ stream:} \quad \dot{n}_{br_{i+1}}^s = \dot{n}_{br_i}^s - \frac{(1 - R^p)\dot{n}_{br_i}^s}{n}, \quad (14)$$

$$\dot{V}_{fw_{i+1}} \text{ stream:} \quad \dot{n}_{fw_{i+1}}^s = \dot{n}_{fw_i}^s + (\dot{n}_{br_i}^s - \dot{n}_{br_{i+1}}^s) = \dot{n}_{fw_i}^s + \frac{(1 - R^p)\dot{n}_{br_i}^s}{n} \quad (15)$$

where  $\dot{n}_{br_i}^s$  is the molar flow of salt in the  $br$  stream entering  $mm_i$ ;  $\dot{n}_{fw_i}^s$  is the molar salt flow in the  $fw$  stream entering membrane module  $mm_i$ ;  $\dot{n}_{br_{i+1}}^s$  is the remaining molar salt flow on the retantate side;  $\dot{n}_{fw_{i+1}}^s$  is the molar salt flow in the  $fw$  stream exiting membrane module  $mm_i$  on the feed side and  $n$  is the number of stages in the multistage PRO process.

Using the volumetric and molar salt flows we describe the osmotic pressures of the streams leaving  $mm_i$ , note that the osmotic pressure and other relevant properties of  $\dot{V}_{br_i}$  and  $\dot{V}_{fw_i}$  streams are known. The osmotic pressure for the  $\dot{V}_{br_{i+1}}$  stream is  $\pi_{br_{i+1}}^p$  and for the  $\dot{V}_{fw_{i+1}}$  it is  $\pi_{fw_i}^p$ , where the superscript ' $p$ ' denotes that this variable is used for the PRO stage. Further using Morse osmotic pressure equation with van't Hoff's correction factor [2] and Eqns. (10, 11, 12, 14, 15), we find the osmotic pressures as

$$V_{br_{i+1}} \text{ stream} : \quad \pi_{br_{i+1}}^p = i\bar{R}T \frac{\dot{n}_{br_{i+1}}^p}{\dot{V}_{br_{i+1}}} = i\bar{R}T \left( \dot{n}_{br_i}^p - \frac{(1 - R)\dot{n}_{br_i}^p}{n} \right) \frac{1}{\dot{V}_{br_i}(Y_i)}, \quad (16)$$

$$V_{fw_{i+1}} \text{ stream} : \quad \pi_{fw_{i+1}}^p = i\bar{R}T \frac{\dot{n}_{fw_{i+1}}^s}{\dot{V}_{fw_{i+1}}} = i\bar{R}T \frac{1}{\dot{V}_{fw_i} - \dot{V}_{br_i}(Y_i - 1)} \left( \dot{n}_{fw_i}^s + \frac{(1 - R^p)\dot{n}_{br_i}^s}{n} \right), \quad (17)$$

where  $i$  is the van't Hoff factor;  $\bar{R}$  is the universal gas constant and  $T$  is the temperature of the streams, which is constant (rest of the variables are predefined).

Now we have all properties associated with the streams entering and leaving the  $i^{th}$  membrane module ( $mm_i$ ) in terms of the known variables. The next step is to have the hydraulic pressure required in  $mm_i$ , in terms of  $Y_i$  and other known streams and membrane properties/variables. For this we use the membrane effectiveness equation and solve for hydraulic pressure. The membrane effectiveness equation for the  $i^{th}$  membrane module ( $mm_i$ ) in the PRO process is defined as

$$\eta_{mm_i}^p = \frac{(\pi_{br_i}^p - \pi_{fw_i}^p) - (\pi_{br_{i+1}}^p - \pi_{fw_{i+1}}^p)}{(\pi_{br_i}^p - \pi_{fw_i}^p) - \Delta P_i^p}, \quad (18)$$

where  $\pi_{br_i}^p$  is the osmotic pressure of the  $\dot{V}_{br_i}$  stream entering the  $i^{th}$  membrane module ( $mm_i$ ) on the draw side;  $\pi_{br_{i+1}}^p$  is the osmotic pressure of the  $\dot{V}_{br_{i+1}}$  stream, which is exiting ( $mm_i$ ) on the draw side;  $\pi_{fw_i}^p$  is the osmotic pressure of the  $\dot{V}_{fw_i}$  stream entering  $mm_i$  on the feed side;  $\pi_{fw_{i+1}}^p$  is the osmotic pressure of the saltier stream  $\dot{V}_{fw_{i+1}}$ , which is leaving the membrane module on the feed side.  $\Delta P_i^p$  is the difference of hydraulic pressure between the draw and the feed streams entering the  $i^{th}$  membrane module ( $mm_i$ ).

We solve Eq. (18) to find the hydraulic pressure

$$\Delta P_i^p = (P_i^p - P_0) = (\pi_{br_i}^p - \pi_{fw_i}^p) - \frac{(\pi_{br_i}^p - \pi_{fw_i}^p) - (\pi_{br_{i+1}}^p - \pi_{fw_{i+1}}^p)}{\eta_{mm_i}^p} \quad (19)$$

Further using Eq(s). (16) and (17), we expand the hydraulic pressure for the  $i^{th}$  membrane module, in terms of the known variables and the optimizing parameter  $Y_i$ , as

$$P_i^p = (\pi_{br_i}^p - \pi_{fw_i}^p) + P_0 - \frac{1}{\eta_{mm_i}^p} \left( (\pi_{br_i}^p - \pi_{fw_i}^p) - \left[ i\bar{R}T \left( \dot{n}_{br_i}^p - \frac{(1 - R^p)\dot{n}_{br_i}^p}{n} \right) \frac{1}{\dot{V}_{br_i}(Y_i)} \right] \right. \\ \left. - \frac{1}{\eta_{mm_i}^p} \left[ i\bar{R}T \frac{1}{\dot{V}_{fw_i} - \dot{V}_{br_i}(Y_i - 1)} \left( \dot{n}_{fw_i}^s + \frac{(1 - R^p)\dot{n}_{br_i}^s}{n} \right) \right] \right) \quad (20)$$

The equations suggest that the amount of hydraulic pressure that must be applied to the draw stream entering the  $i^{th}$  membrane module ( $mm_i$ ) depends on the membrane's performance properties, osmotic pressure of the  $\dot{V}_{sw_i}$  stream entering the membrane module, but is ultimately controlled by the desired mixing ratio  $Y_i$ , for that particular membrane module.

## References

- [1] Qureshi BA, Zubair SM, Sheikh AK, Bhujle A, Dubowsky S. Design and performance evaluation of reverse osmosis desalination systems: An emphasis on fouling modeling. *Applied Thermal Engineering*. 2013 Oct 2;60(1–2):208–17.
- [2] Smith BT. Remington Education: Physical Pharmacy. Pharmaceutical Press; 2015. 193 p.
- [3] Bharadwaj D, Fyles TM, Struchtrup H. Multistage Pressure-Retarded Osmosis. *Journal of Non-Equilibrium Thermodynamics*. 2016;41(4):327–347.
